# Supplementary material for: CpLEA5, the Late Embryogenesis Abundant Protein Gene from Chimonanthus praecox, Possesses Low Temperature and Osmotic Resistances in Prokaryote and Eukaryotes
Source: PubMed Central journal article supplement (PMC4661864; doi:10.3390/ijms161126006), 2015-11-11
Supplement: ijms-16-26006-s001.pdf [file ijms-16-26006-s001.pdf]

# Supplementary Materials: *CpLEA5*, the Late Embryogenesis Abundant Protein Gene from *Chimonanthus praecox*, Possesses Low Temperature and Osmotic Resistances in Prokaryote and Eukaryotes

Yiling liu, Xieli Xia, Xilong Liang and Shihong Zhang

**Table S1.** Percent identity matrix for strains presented in Figure 1 was performed by alignment program of Clustal Omega [43].

| Strain             | % Identity     |                  |                    |                  |                 |                    |                   |                    |                  |                   |
|--------------------|----------------|------------------|--------------------|------------------|-----------------|--------------------|-------------------|--------------------|------------------|-------------------|
|                    | <i>Z. mays</i> | <i>O. sativa</i> | <i>C. sinensis</i> | <i>C. unshiu</i> | <i>T. cacao</i> | <i>R. communis</i> | <i>C. praecox</i> | <i>N. nucifera</i> | <i>S. nigrum</i> | <i>N. tabacum</i> |
| <i>Z. mays</i>     | 100.00         | 67.78            | 35.71              | 35.71            | 38.82           | 38.82              | 40.51             | 36.90              | 45.57            | 40.74             |
| <i>O. sativa</i>   | 67.78          | 100.00           | 38.10              | 38.10            | 45.24           | 42.35              | 43.04             | 38.82              | 43.59            | 41.98             |
| <i>C. sinensis</i> | 35.71          | 38.10            | 100.00             | 97.94            | 61.46           | 61.29              | 50.00             | 53.68              | 48.35            | 52.13             |
| <i>C. unshiu</i>   | 35.71          | 38.10            | 97.94              | 100.00           | 60.42           | 60.22              | 47.73             | 52.63              | 46.15            | 50.00             |
| <i>T. cacao</i>    | 38.82          | 45.24            | 61.46              | 60.42            | 100.00          | 64.58              | 46.74             | 50.51              | 47.87            | 48.96             |
| <i>R. communis</i> | 38.82          | 42.35            | 61.29              | 60.22            | 64.58           | 100.00             | 43.18             | 50.53              | 42.22            | 50.54             |
| <i>C. praecox</i>  | 40.51          | 43.04            | 50.00              | 47.73            | 46.74           | 43.18              | 100.00            | 53.26              | 41.18            | 42.22             |
| <i>N. nucifera</i> | 36.90          | 38.82            | 53.68              | 52.63            | 50.51           | 50.53              | 53.26             | 100.00             | 51.09            | 54.74             |
| <i>S. nigrum</i>   | 45.57          | 43.59            | 48.35              | 46.15            | 47.87           | 42.22              | 41.18             | 51.09              | 100.00           | 67.39             |
| <i>N. tabacum</i>  | 40.74          | 41.98            | 52.13              | 50.00            | 48.96           | 50.54              | 42.22             | 54.74              | 67.39            | 100.00            |

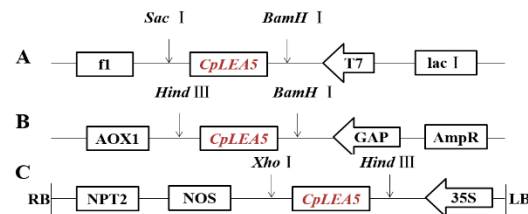

**Figure S1.** Construction of *CpLEA5*-containing Transformation Vectors. **(A)** The pET-32a::*CpLEA5* vector used for prokaryotic expression; **(B)** The pRUL129::*CpLEA5* vector used for yeast expression; **(C)** T-DNA map of the pTEV7::*CpLEA5* binary vector to transform plants. GAP: GAP promoter; 35S: CaMV 35S promoter; T7: T7 promoter; f1: f1 origin; lac I, lac I coding sequence; NOS, NOS terminator; AmpR, ampicillin resistance gene; NPT2, kanamycin resistance gene.
